# Supplementary material for: Progressive recruitment of distal MEC-4 channels determines touch response strength in C. elegans
Source: PubMed Central journal article supplement — J Gen Physiol. 2019 Sep 18;151(10):1213–30. doi: 10.1085/jgp.201912374 (PMC6785734; doi:10.1085/jgp.201912374), 2019-09-18
Supplement: JGP_201912374_sm.pdf [file JGP_201912374_sm.pdf]

## Supplemental material

Katta et al., <https://doi.org/10.1085/jgp.201912374>

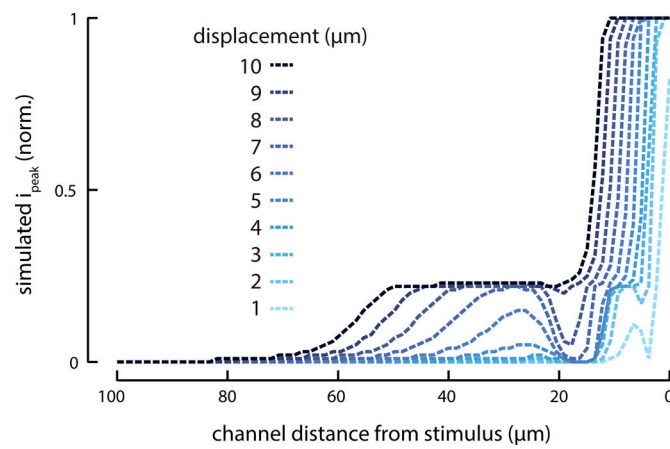

Figure S1. **Individual channel responses depend on both channel distance and stimulus size.** The peak current through individual channels (normalized to the single-channel open current  $i_o = 1.6$  pA) in response to a step stimulus is highest for channels near the point of stimulation. At larger distances, the current reflects the nonlinearity of the strain field and increasing likelihood of the channel being in a subconducting rather than a fully open state.
